# Supplementary material for: Mitochondrial phylogeography of baboons (Papiospp.) – Indication for introgressive hybridization?
Source: Springer Nature journal article supplement (doi:10.1186/1471-2148-9-83), 2009-04-23
Supplement: 12862_2008_997_MOESM1_ESM.pdf [file 12862_2008_997_MOESM1_ESM.pdf]

Additional file 1: Sample localities (geographic coordinates in decimal degrees), haplotype designations and GenBank accession numbers for cytb and 'Brown region' haplotypes. Sequences used for divergence times estimates are marked by an asterisk.

| id   | taxon               | country       | site (side code)                     | longitude,<br>latitude | haplotype | acc no<br>cytb | acc no<br>'Brown' |
|------|---------------------|---------------|--------------------------------------|------------------------|-----------|----------------|-------------------|
| 096* | <i>Papio anubis</i> | Côte d'Ivoire | Comoe NP<br>(KoN)                    | -3.79000<br>8.80000    | A01       | EU885420       | EU885767          |
| 545  | <i>P. anubis</i>    | Nigeria       | Bwari, Abuja<br>(Bwa)                | 7.22030<br>8.81140     | A02       | EU885421       | EU885768          |
| 546  | <i>P. anubis</i>    | Nigeria       | Lumma, Niger<br>State (Lum)          | 4.26420<br>10.31810    | A03       | EU885422       | EU885769          |
| 550* | <i>P. anubis</i>    | Nigeria       | Lumma, Niger<br>State (Lum)          | 4.26420<br>10.31810    | A04       | EU885423       | EU885770          |
| 547* | <i>P. anubis</i>    | Nigeria       | Kemainja, Kwara<br>State (Kem)       | 3.91670<br>9.71670     | A05       | EU885424       | EU885771          |
| 548  | <i>P. anubis</i>    | Nigeria       | Sepeteri, Oyo<br>State (Sep)         | 3.65000<br>8.63330     | A06       | EU885425       | EU885772          |
| EY01 | <i>P. anubis</i>    | Nigeria       | Gashaka Gumpti<br>NP, Kwano (Kwa)    | 11.58333<br>7.31667    | A06       | EU885426       | EU885773          |
| EY10 | <i>P. anubis</i>    | Nigeria       | Gashaka Gumpti<br>NP, Kwano (Kwa)    | 11.58333<br>7.31667    | A06       | EU885427       | EU885774          |
| 549* | <i>P. anubis</i>    | Nigeria       | Chigwa, Kaduna<br>State (Chi)        | 7.81670<br>9.35000     | A07       | EU885428       | EU885775          |
| 555  | <i>P. anubis</i>    | Nigeria       | Chigwa, Kaduna<br>State (Chi)        | 7.81670<br>9.35000     | A07       | EU885429       | EU885776          |
| 552* | <i>P. anubis</i>    | Nigeria       | Kura, Plateau<br>State (Kur)         | 9.26667<br>9.91667     | A08       | EU885430       | EU885777          |
| 559  | <i>P. anubis</i>    | Cameroon      | Primate Rescue<br>Center Limbe (Lib) | 13.93333<br>10.56667   | A09       | EU885431       | EU885778          |
| 448* | <i>P. anubis</i>    | Uganda        | Kibale Forest<br>(Kib)               | 30.40000<br>0.48333    | A10       | EU885432       | EU885779          |
| 512  | <i>P. anubis</i>    | DRC           | south Bukavu<br>(sBu)                | 28.91092<br>-2.68258   | A11       | EU885433       | EU885780          |
| 184  | <i>P. anubis</i>    | Eritrea       | Ruba Griset<br>(Gri)                 | 36.76018<br>14.88322   | A12       | EU885434       | EU885781          |
| 194  | <i>P. anubis</i>    | Eritrea       | Ruba Hadejemi<br>(Had)               | 36.90710<br>14.35827   | A13       | EU885435       | EU885782          |
| 349  | <i>P. anubis</i>    | Ethiopia      | Managasha NP<br>(Man)                | 38.57125<br>8.96838    | A14       | EU885436       | EU885783          |

|                  |                        |          |                               |                       |     |          |          |
|------------------|------------------------|----------|-------------------------------|-----------------------|-----|----------|----------|
| 527              | <i>P. anubis</i>       | Kenya    | Segera Ranch (Seg)            | 36.01581<br>0.25338   | A15 | EU885437 | EU885784 |
| 536              | <i>P. anubis</i>       | Kenya    | Segera Ranch (Seg)            | 36.01581<br>0.25338   | A16 | EU885438 | EU885785 |
| 353*             | <i>P. anubis</i>       | Tanzania | Serengeti NP (Swr)            | 34.85236<br>-2.43100  | A17 | EU885439 | EU885786 |
| 507 <sup>s</sup> | <i>P. cynocephalus</i> | Somalia  | Webi Shebelli (Web)           | 45.43333<br>2.42083   | C01 | EU885440 | EU885787 |
| 529*             | <i>P. cynocephalus</i> | Kenya    | Diani Beach (Dia)             | 39.55000<br>-4.32000  | C02 | EU885441 | EU885788 |
| 533              | <i>P. cynocephalus</i> | Kenya    | Diani Beach (Dia)             | 39.55000<br>-4.32000  | C02 | EU885442 | EU885789 |
| 537              | <i>P. cynocephalus</i> | Kenya    | Amboseli NP (Amb)             | 37.39000<br>-2.29000  | C03 | EU885443 | EU885790 |
| 404 <sup>s</sup> | <i>P. cynocephalus</i> | Tanzania | Lake Rukwa (Ruk)              | 32.15517<br>-7.58297  | C04 | EU885444 | EU885791 |
| 151*             | <i>P. cynocephalus</i> | Malawi   | Michiru Mts. Cons. Area (Mic) | 34.91667<br>-15.75000 | C05 | EU885445 | EU885792 |
| 288              | <i>P. cynocephalus</i> | Malawi   | Mulanje Mt. (Mu2)             | 35.51667<br>-15.95000 | C06 | EU885446 | EU885793 |
| 409              | <i>P. cynocephalus</i> | Zambia   | South Luangwa NP (LuS)        | 31.63793<br>-13.26840 | C07 | EU885447 | EU885794 |
| 411              | <i>P. cynocephalus</i> | Zambia   | South Luangwa NP (LuS)        | 31.63793<br>-13.26840 | C08 | EU885448 | EU885795 |
| 570              | <i>P. cynocephalus</i> | Zambia   | Luambe NP (Lua)               | 32.14550<br>-12.45780 | C09 | EU885449 | EU885796 |
| 565*             | <i>P. cynocephalus</i> | Zambia   | Kafue NP, North (KfN)         | 26.53577<br>-14.96779 | C10 | EU885450 | EU885797 |
| 568              | <i>P. cynocephalus</i> | Zambia   | Kasanka NP (Kas)              | 30.25202<br>-12.59059 | C11 | EU885451 | EU885798 |
| 569*             | <i>P. cynocephalus</i> | Zambia   | Shiwa N' gandu (Shi)          | 31.73892<br>-11.19677 | C12 | EU885452 | EU885799 |
| 037              | <i>P. hamadryas</i>    | Eritrea  | Abdur (Abd)                   | 39.84585<br>15.12857  | H01 | EU885453 | EU885800 |
| 074              | <i>P. hamadryas</i>    | Eritrea  | Kubkub (Kub)                  | 38.63217<br>16.34482  | H02 | EU885454 | EU885801 |
| 391              | <i>P. hamadryas</i>    | Eritrea  | Afabet (Afb)                  | 38.74958<br>16.12017  | H03 | EU885455 | EU885802 |
| 301              | <i>P. hamadryas</i>    | Ethiopia | Awash Station (ASt)           | 40.17775<br>8.99268   | H04 | EU885456 | EU885803 |
| 319              | <i>P. hamadryas</i>    | Ethiopia | Gerba Luku (Ger)              | 41.53400<br>9.58740   | H05 | EU885457 | EU885804 |
| 414*             | <i>P. hamadryas</i>    | Yemen    | Bura'a Forest, Hodaidah (BuH) | 43.41667<br>14.86667  | H06 | EU885458 | EU885805 |
| 526              | <i>P. papio</i>        | Senegal  | Mt. Assirik, NK NP            | -12.76667             | P01 | EU885459 | EU885806 |

|      |                   |            |                                      |                       |     |          |          |
|------|-------------------|------------|--------------------------------------|-----------------------|-----|----------|----------|
|      |                   |            | (Ass)                                | 12.88333              |     |          |          |
| 556  | <i>P. papio</i>   | Senegal    | Niokolo Koba, NK<br>NP (Nio)         | -12.72090<br>13.07467 | P01 | EU885460 | EU885807 |
| 518  | <i>P. papio</i>   | Senegal    | Kedougou<br>(Ked)                    | -12.12472<br>12.57556 | P02 | EU885461 | EU885808 |
| 523* | <i>P. papio</i>   | Senegal    | Kedougou<br>(Ked)                    | -12.12472<br>12.57556 | P03 | EU885462 | EU885809 |
| 252* | <i>P. papio</i>   | Guinea     | Bakaria, Haute<br>Niger NP (Bak)     | -10.31542<br>10.54267 | P04 | EU885463 | EU885810 |
| 566  | <i>P. ursinus</i> | Zambia     | Kafue NP, Middle<br>New Kalala (Nka) | 26.01077<br>-15.77360 | U01 | EU885464 | EU885811 |
| 567  | <i>P. ursinus</i> | Zambia     | Kafue NP, Middle<br>(KfM)            | 25.99809<br>-15.79781 | U01 | EU885465 | EU885812 |
| 501  | <i>P. ursinus</i> | Zimbabwe   | Nyanga<br>(Nya)                      | 32.81283<br>-19.05781 | U02 | EU885466 | EU885813 |
| 539  | <i>P. ursinus</i> | Mozambique | Gorongosa NP<br>(Gor)                | 34.36111<br>-18.97833 | U03 | EU885467 | EU885814 |
| 540  | <i>P. ursinus</i> | Mozambique | Gorongosa NP<br>(Gor)                | 34.36111<br>-18.97833 | U03 | EU885468 | EU885815 |
| 492* | <i>P. ursinus</i> | Botswana   | Moremi Wildlife<br>Res (Mor)         | 23.00000<br>-19.18349 | U04 | EU885469 | EU885816 |
| 422  | <i>P. ursinus</i> | RSA        | Pilanesberg Game<br>Res (Pil)        | 26.87805<br>-25.11111 | U05 | EU885470 | EU885817 |
| 425  | <i>P. ursinus</i> | RSA        | Pilanesberg Game<br>Res (Pil)        | 26.87805<br>-25.11111 | U05 | EU885471 | EU885818 |
| 478  | <i>P. ursinus</i> | Namibia    | Waterberg Plateau<br>(Wat)           | 17.24221<br>-20.50450 | U05 | EU885472 | EU885819 |
| 435  | <i>P. ursinus</i> | RSA        | Blyde River,<br>Blydepoort (Bly)     | 30.78049<br>-24.66667 | U06 | EU885473 | EU885820 |
| 563* | <i>P. ursinus</i> | RSA        | Ithala Game Res<br>(Ita)             | 31.26667<br>-27.53333 | U07 | EU885474 | EU885821 |
| 564  | <i>P. ursinus</i> | RSA        | Ithala Game Res<br>(Ita)             | 31.26667<br>-27.53333 | U07 | EU885475 | EU885822 |
| 558  | <i>P. ursinus</i> | Namibia    | Okasewa Ranch<br>(Oka)               | 18.34910<br>-22.41203 | U08 | EU885476 | EU885823 |
| 470  | <i>P. ursinus</i> | RSA        | Loskop Nature Res<br>(Los)           | 29.28162<br>-25.42147 | U09 | EU885477 | EU885824 |
| 468  | <i>P. ursinus</i> | RSA        | Loskop Nature Res<br>(Los)           | 29.28162<br>-25.42147 | U10 | EU885478 | EU885825 |
| 560  | <i>P. ursinus</i> | Angola     | Serra Leba,<br>Lubango (Lub)         | 13.24167<br>-15.14167 | U11 | EU885479 | EU885826 |
| 472  | <i>P. ursinus</i> | Namibia    | Hakos Guestfarm<br>(Hak)             | 16.36463<br>-23.23708 | U12 | EU885480 | EU885827 |
| 482  | <i>P. ursinus</i> | Namibia    | Spreetshoogte NR<br>(Spr)            | 16.20555<br>-23.64758 | U12 | EU885481 | EU885828 |

|                            |                                 |     |                                  |                       |     |           |           |
|----------------------------|---------------------------------|-----|----------------------------------|-----------------------|-----|-----------|-----------|
| 541*                       | <i>P. ursinus</i>               | RSA | Giant's Castle<br>Game Res (Dra) | 29.48333<br>-29.33333 | U13 | EU885482  | EU885829  |
| 542                        | <i>P. ursinus</i>               | RSA | Giant's Castle<br>Game Res (Dra) | 29.48333<br>-29.33333 | U13 | EU885483  | EU885830  |
| 543                        | <i>P. ursinus</i>               | RSA | Giant's Castle<br>Game Res (Dra) | 29.48333<br>-29.33333 | U13 | EU885484  | EU885831  |
| 561                        | <i>P. ursinus</i>               | RSA | Goegap Nature<br>Res (Goe)       | 18.03222<br>-29.69944 | U14 | EU885485  | EU885832  |
| 463*                       | <i>P. ursinus</i>               | RSA | DeHoop Nature<br>Res (Hop)       | 20.40658<br>-34.45621 | U15 | EU885486  | EU885833  |
| 149                        | <i>Theropithecus<br/>gelada</i> |     | Zoo Duisburg,<br>Germany         |                       | T01 | EU885487  | EU885834  |
| divergence times estimates |                                 |     |                                  |                       |     |           |           |
|                            | <i>Cebus<br/>albifrons</i>      |     |                                  |                       |     | AJ309866  | AJ309866  |
|                            | <i>Pongo<br/>pygmaeus</i>       |     |                                  |                       |     | NC_001646 | NC_001646 |
|                            | <i>Pan<br/>troglodytes</i>      |     |                                  |                       |     | D38113    | D38113    |
|                            | <i>Homo<br/>sapiens</i>         |     |                                  |                       |     | AY339522  | AY339522  |
|                            | <i>Colobus<br/>guereza</i>      |     |                                  |                       |     | NC_00690  | NC_00690  |
|                            | <i>Chlorocebus<br/>aethiops</i> |     |                                  |                       |     | NC_00700  | NC_00700  |
|                            | <i>Macaca<br/>sylvanus</i>      |     |                                  |                       |     | AJ309865  | AJ309865  |
|                            | <i>M. mulatta</i>               |     |                                  |                       |     | AY612638  | AY612638  |

DRC = Democratic Republic of Congo; RSA = Republic of South Africa; §tissue from museum specimens
