# Supplementary material for: Mitochondrial phylogeography of baboons (Papiospp.) – Indication for introgressive hybridization?
Source: Springer Nature journal article supplement (doi:10.1186/1471-2148-9-83), 2009-04-23
Supplement: 12862_2008_997_MOESM2_ESM.pdf [file 12862_2008_997_MOESM2_ESM.pdf]

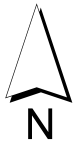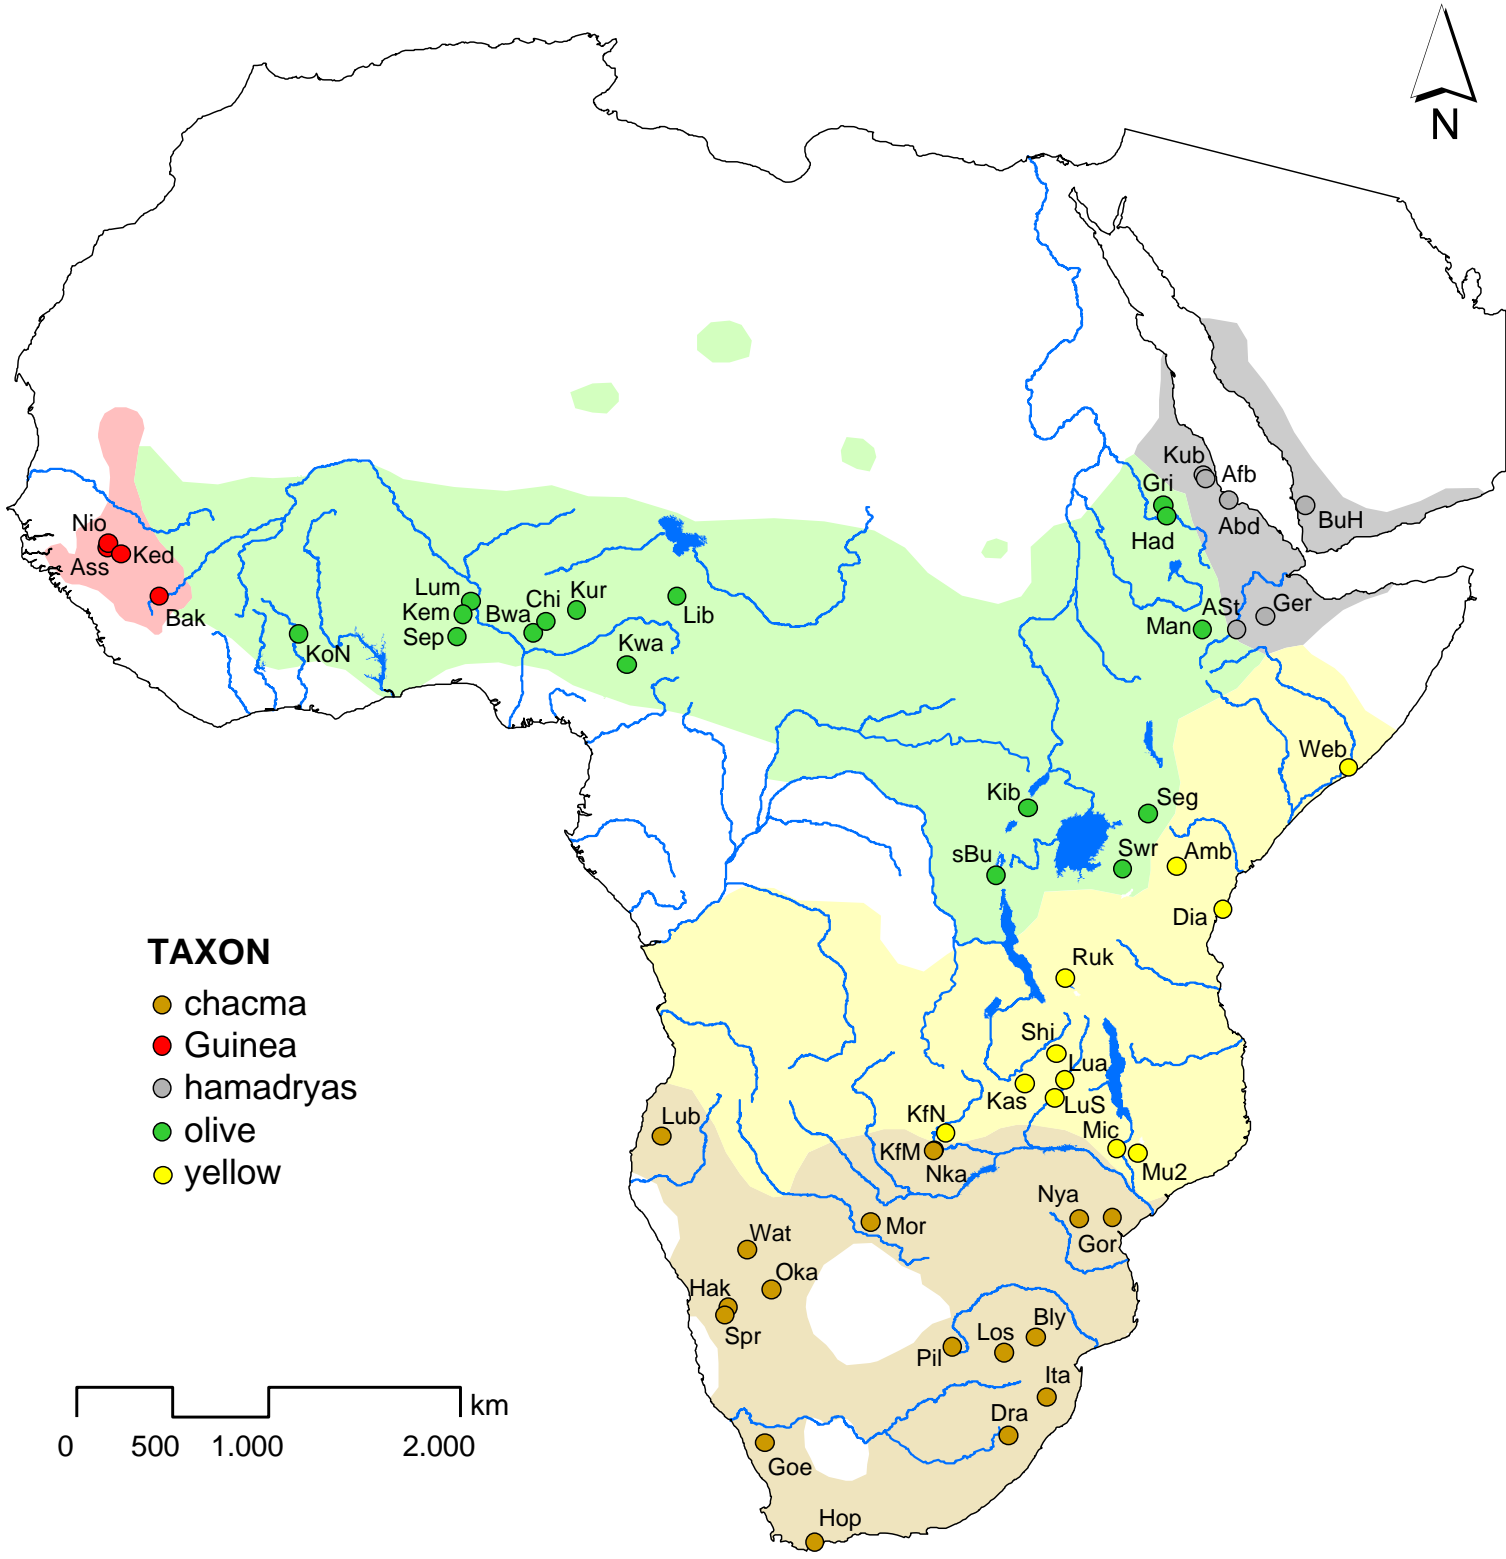

**TAXON**

- chacma
- Guinea
- hamadryas
- olive
- yellow

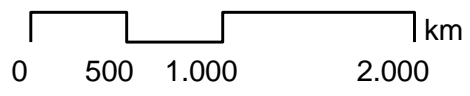

Nio, Ass, Ked, Bak, KoN, Lum, Kem, Sep, Bwa, Chi, Kur, Lib, Kwa, Kib, Seg, sBu, Swr, Amb, Dia, Ruk, Shi, Kas, LuS, Mic, Mu2, Lub, KfN, Nka, Mor, Nya, Gor, Wat, Oka, Hak, Spr, Pil, Los, Bly, Ita, Dra, Goe, Hop, Web, Kub, Gri, Had, Afb, Abd, BuH, ASt, Ger, Man, Web, Dia, Ruk, Shi, Kas, LuS, Mic, Mu2, Lub, KfN, Nka, Mor, Nya, Gor, Wat, Oka, Hak, Spr, Pil, Los, Bly, Ita, Dra, Goe, Hop
