# Supplementary material for: Mitochondrial phylogeography of baboons (Papiospp.) – Indication for introgressive hybridization?
Source: Springer Nature journal article supplement (doi:10.1186/1471-2148-9-83), 2009-04-23

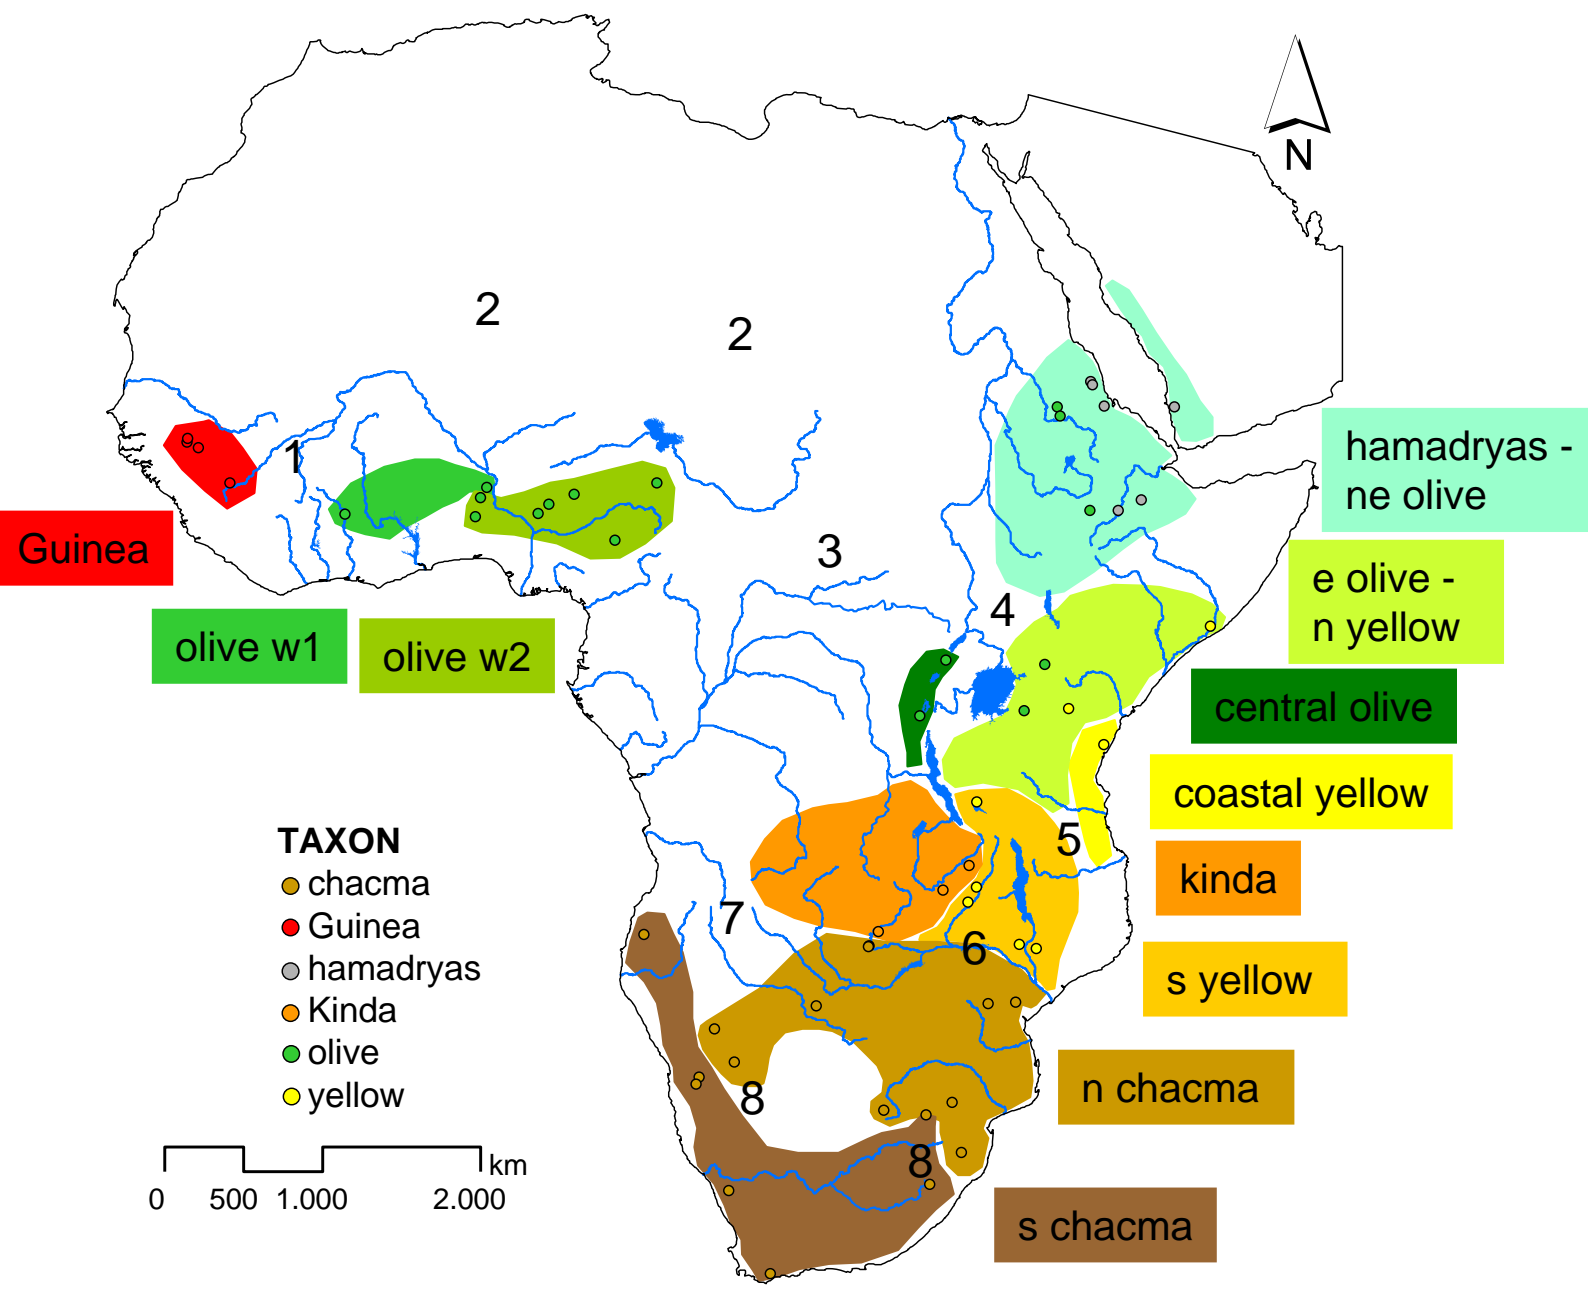

Supplement: 12862_2008_997_MOESM4_ESM.pdf [file 12862_2008_997_MOESM4_ESM.pdf]
